# Supplementary material for: Elevated NDC1 expression predicts poor prognosis and correlates with immunity in hepatocellular carcinoma
Source: PubMed Central journal article supplement — J Gastrointest Oncol. 2023 Feb 28;14(1):245–64. doi: 10.21037/jgo-22-1166 (PMC10007937; doi:10.21037/jgo-22-1166), 2023-02-28
Supplement: jgo-14-01-245-dss.pdf [file jgo-14-01-245-dss.pdf]

## Data Sharing Statement

|                     |                                                                                                                                                     |                                                            |
|---------------------|-----------------------------------------------------------------------------------------------------------------------------------------------------|------------------------------------------------------------|
| <b>Article Info</b> | <a href="https://dx.doi.org/10.21037/jgo-22-1166">https://dx.doi.org/10.21037/jgo-22-1166</a>                                                       |                                                            |
| <b>Item</b>         | <b>Question</b>                                                                                                                                     | <b>Authors' Response<br/>(place "-" if not applicable)</b> |
| 1                   | Would you like to share data collected for your study to others?                                                                                    | No                                                         |
| 2                   | If not, would you like to share the reason for your decision?                                                                                       | Our group need these data to further explore more deeply.  |
| 3                   | What data in particular will be shared?                                                                                                             | -                                                          |
| 4                   | Any other documents will be shared? Such as study protocol, statistical analysis plan, informed consent form, clinical study report, analytic code. | -                                                          |
| 5                   | When will data availability begin?                                                                                                                  | -                                                          |
| 6                   | When will data availability end?                                                                                                                    | -                                                          |
| 7                   | To whom will you share the data?                                                                                                                    | -                                                          |
| 8                   | For what type of analysis or purpose?                                                                                                               | -                                                          |
| 9                   | How or where can the data/documents be obtained?                                                                                                    | -                                                          |
| 10                  | Any other restrictions?                                                                                                                             | -                                                          |
